# Supplementary material for: Outbreaks of Foot-and-Mouth Disease in Burundi, East Africa, in 2016, Caused by Different Serotypes
Source: MDPI journal article supplement (doi:10.3390/v14051077), 2022-05-17
Supplement: s1 [file s1]

**Table S1.** Serological profile in cattle after reported FMD outbreaks in Burundi in 2016.

| Province | # NSP positive samples | # samples positive for a particular serotype of FMDV or positive for a particular combination of serotypes |    |   |      |      |      |           |                                                            |                    |                 |                         |                                                               |         |            |            |            |                 |                 |
|----------|------------------------|------------------------------------------------------------------------------------------------------------|----|---|------|------|------|-----------|------------------------------------------------------------|--------------------|-----------------|-------------------------|---------------------------------------------------------------|---------|------------|------------|------------|-----------------|-----------------|
|          |                        | Monovalent serum                                                                                           |    |   |      |      |      |           | Polyvalent serum positive for at least O, A, SAT1 and SAT2 |                    |                 |                         | Polyvalent serum positive for other combinations of serotypes |         |            |            |            |                 |                 |
|          |                        | O                                                                                                          | A  | C | SAT1 | SAT2 | SAT3 | doubtful* | O, A, SAT1 SAT2                                            | O, A, C, SAT1 SAT2 | O, A, SAT1 SAT2 | O, A, C, SAT1 SAT2 SAT3 | O, A                                                          | O, A, C | O, A, SAT1 | O, A, SAT2 | O, A, SAT3 | O, A, SAT1 SAT3 | O, A, SAT2 SAT3 |
| Bubanza  | 45                     | 5                                                                                                          | 2  |   | 1    | 2    |      | 6         | 2                                                          | 2                  | 2               | 1                       | 1                                                             |         | 4          | 1          | 1          |                 |                 |
| Bururi   | 19                     |                                                                                                            |    |   |      | 6    |      |           | 1                                                          |                    |                 | 1                       | 2                                                             |         |            | 1          |            |                 | 2               |
| Cankuzo  | 29                     |                                                                                                            |    |   |      | 10   |      |           |                                                            |                    |                 | 5                       |                                                               |         |            | 2          |            |                 |                 |
| Cibitoke | 28                     |                                                                                                            | 7  | 1 |      | 1    |      | 3         |                                                            |                    |                 | 1                       | 2                                                             | 3       |            |            | 1          | 2               |                 |
| Rutana   | 28                     | 1                                                                                                          | 1  | 2 |      | 5    |      | 4         |                                                            |                    | 1               | 1                       |                                                               |         |            | 1          |            |                 |                 |
| Total    | 149                    | 6                                                                                                          | 10 | 3 | 1    | 24   | 0    | 13        | 3                                                          | 2                  | 9               | 5                       | 3                                                             | 3       | 4          | 5          | 2          | 2               | 2               |

\* Doubtful result when the threshold for positivity was not exceeded for any of the six serotypes tested.

**Table S1 (continued).** Serological profile in cattle after reported FMD outbreaks in Burundi in 2016.

| Province | # samples positive for a particular serotype of FMDV or positive for a particular combination of serotypes |                                                               |                      |         |         |              |              |                   |      |                 |              |              |                   |                   |                   |                         |                         |                         |                |
|----------|------------------------------------------------------------------------------------------------------------|---------------------------------------------------------------|----------------------|---------|---------|--------------|--------------|-------------------|------|-----------------|--------------|--------------|-------------------|-------------------|-------------------|-------------------------|-------------------------|-------------------------|----------------|
|          |                                                                                                            | Polyvalent serum positive for other combinations of serotypes |                      |         |         |              |              |                   |      |                 |              |              |                   |                   |                   |                         |                         |                         |                |
|          | O, C                                                                                                       | O, C, SAT1 SAT2                                               | O, C, SAT1 SAT2 SAT3 | O, SAT1 | O, SAT2 | O, SAT1 SAT2 | O, SAT2 SAT3 | O, SAT1 SAT2 SAT3 | A, C | A, C, SAT2 SAT3 | A, SAT1 SAT2 | A, SAT2 SAT3 | A, SAT1 SAT2 SAT3 | C, SAT1 SAT2 SAT3 | C, SAT1 SAT2 SAT3 | O, A, C, SAT1 SAT2 SAT3 | O, A, C, SAT1 SAT2 SAT3 | O, A, C, SAT1 SAT2 SAT3 | SAT1 SAT2 SAT3 |
| Bubanza  | 1                                                                                                          | 1                                                             |                      | 5       | 1       | 1            |              | 1                 | 2    |                 |              |              | 1                 | 1                 |                   |                         |                         | 1                       |                |
| Bururi   |                                                                                                            |                                                               |                      |         | 6       |              |              |                   |      |                 |              |              |                   |                   |                   |                         |                         |                         |                |
| Cankuzo  |                                                                                                            |                                                               |                      |         | 2       | 1            | 2            | 5                 |      |                 |              |              | 1                 |                   |                   |                         |                         |                         | 1              |
| Cibitoke |                                                                                                            |                                                               |                      |         |         |              |              |                   | 3    | 1               |              |              |                   |                   |                   | 1                       | 2                       |                         |                |
| Rutana   |                                                                                                            |                                                               | 1                    |         |         |              |              |                   |      |                 | 1            | 2            | 1                 | 1                 | 1                 |                         |                         |                         | 4              |
| Total    | 1                                                                                                          | 1                                                             | 1                    | 5       | 9       | 2            | 2            | 6                 | 5    | 1               | 1            | 4            | 1                 | 2                 | 1                 | 1                       | 2                       | 1                       | 5              |
